# Supplementary material for: A randomized, 29-day, dose-ranging, efficacy and safety study of daprodustat, administered three times weekly in patients with anemia on hemodialysis
Source: Springer Nature journal article supplement (doi:10.1186/s12882-019-1547-z), 2019-10-16
Supplement: MOESM1 [file 17279620]

## Additional file 1

Table S1. Hemoglobin Over Time and Change from Baseline (ITT Population)

| Hgb (g/dL)                             | Placebo   | Daprodustat<br>Total | Daprodustat Dose |           |           |           |
|----------------------------------------|-----------|----------------------|------------------|-----------|-----------|-----------|
|                                        |           |                      | 10 mg            | 15 mg     | 25 mg     | 30 mg     |
| <b>Baseline,<sup>a</sup> n</b>         | 18        | 79                   | 20               | 18        | 21        | 20        |
| Mean±SD                                | 10.6±0.75 | 10.6±0.69            | 10.6±0.71        | 10.7±0.77 | 10.4±0.59 | 10.5±0.73 |
| <b>Day 15, n</b>                       | 18        | 79                   | 20               | 18        | 21        | 20        |
| Mean±SD                                | 10.3±0.97 | 10.7±0.93            | 10.5±1.19        | 10.6±0.87 | 10.9±0.78 | 10.9±0.85 |
| <b>Change from Baseline</b>            |           |                      |                  |           |           |           |
| Mean±SD                                | -0.3±0.52 | 0.2±0.91             | -0.1±0.84        | 0.0±0.97  | 0.5±0.79  | 0.4±0.93  |
| <b>Day 29, n</b>                       | 17        | 67                   | 19               | 16        | 17        | 15        |
| Mean±SD                                | 10.0±1.12 | 10.8±1.40            | 10.4±1.83        | 10.5±0.93 | 11.1±1.33 | 11.3±1.15 |
| <b>Change from Baseline</b>            |           |                      |                  |           |           |           |
| Mean±SD                                | -0.6±0.65 | 0.2±1.43             | -0.2±1.75        | -0.1±1.09 | 0.6±1.45  | 0.6±1.17  |
| <b>Day 29 (imputed),<sup>b</sup> n</b> | 18        | 79                   | 20               | 18        | 21        | 20        |
| Mean±SD                                | 9.8±1.34  | 11.0±1.54            | 10.5±1.85        | 10.4±1.22 | 11.3±1.36 | 11.7±1.39 |
| <b>Change from Baseline</b>            |           |                      |                  |           |           |           |
| Mean±SD                                | -0.7±0.83 | 0.5±1.68             | -0.1±1.73        | -0.2±1.36 | 0.9±1.47  | 1.2±1.74  |

Hgb, hemoglobin; *ITT*, intention-to-treat; *SD*, standard deviation.

<sup>a</sup>The average of hemoglobin measured by the central lab at week -2 and day 1 visits.

<sup>b</sup>Including participants (1 on placebo and 12 on daprodustat) who had a day 15 hemoglobin value but were missing a day 29 value.

**Table S2. Repeated Measure Analysis for Hemoglobin Change from Baseline at Day 29 (ITT Population)**

| Hgb (g/dL)                                                              | Daprodustat Dose              |                           |                           |                         |                         |
|-------------------------------------------------------------------------|-------------------------------|---------------------------|---------------------------|-------------------------|-------------------------|
|                                                                         | Placebo                       | 10 mg                     | 15 mg                     | 25 mg                   | 30 mg                   |
| <b><i>Model-Adjusted Change from Baseline at Day 29<sup>a</sup></i></b> |                               |                           |                           |                         |                         |
| Adjusted mean±SE<br>(95% CI)                                            | -0.7±0.32<br>(-1.33 to -0.06) | -0.1±0.30<br>(-0.73-0.48) | -0.2±0.32<br>(-0.83-0.46) | 0.8±0.31<br>(0.16-1.38) | 1.0±0.32<br>(0.33-1.61) |
| <b><i>Model-Adjusted Difference from Placebo<sup>a</sup></i></b>        |                               |                           |                           |                         |                         |
| Adjusted mean (95% CI)                                                  | --                            | 0.6<br>(-0.31-1.45)       | 0.5<br>(-0.40-1.42)       | 1.5<br>(0.59-2.35)      | 1.7<br>(0.77-2.57)      |

CI, confidence interval; Hgb, hemoglobin; ITT, intention-to-treat; SE, standard error.

<sup>a</sup>Using a repeated measures model with terms included for baseline, treatment, time, and treatment\*time. Least squares mean estimates and treatment differences of daprodustat group to placebo along with 95% CI are provided.

**Figure S1. A) Geometric Mean Change from Baseline and 95% CI for Hepcidin (ITT Population) and B) Mean Change from Baseline and 95% CI for Ferritin (ITT Population)**

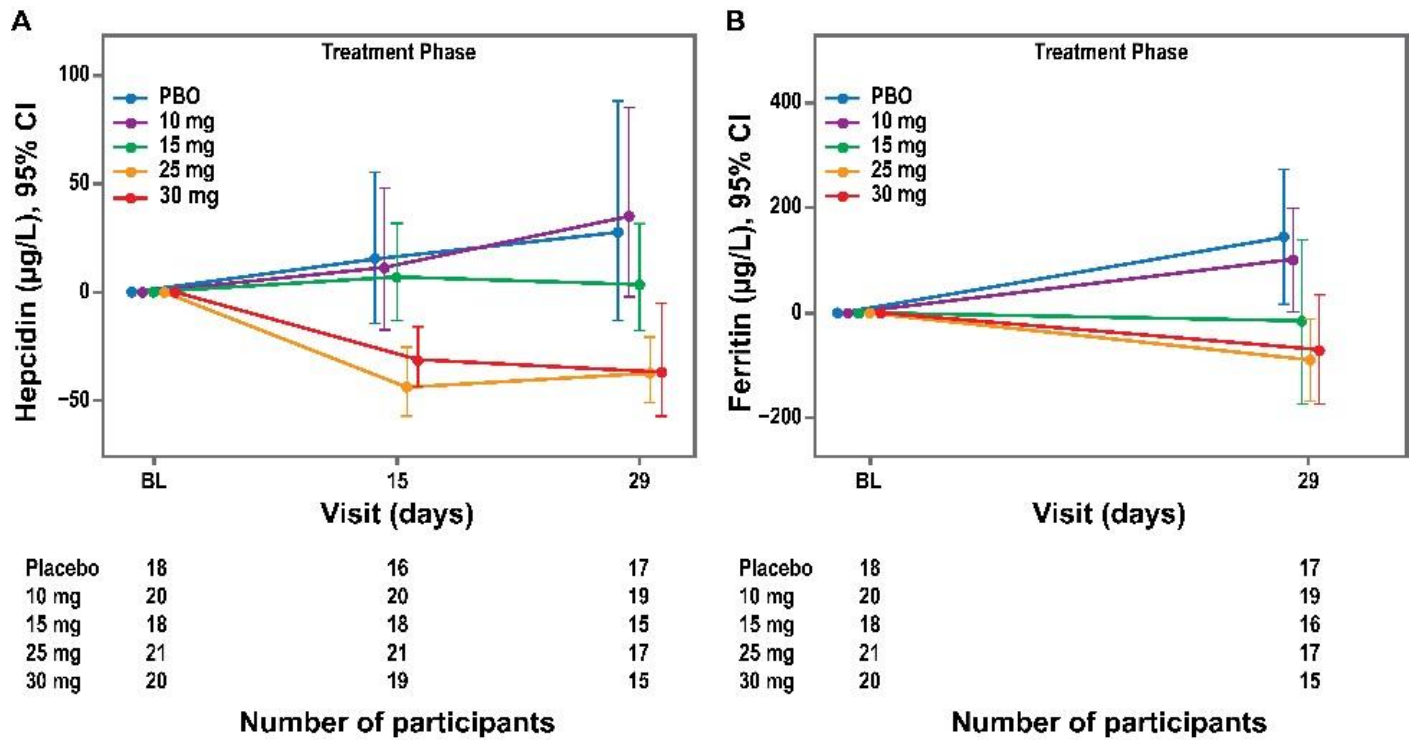

BL, baseline; CI, confidence interval; ITT, intention-to-treat; PBO, placebo.

**Table S3. Change from Baseline in Markers of Iron Metabolism at Day 29 (ITT Population)**

|                                      | Placebo    | Daprodustat<br>Total | Daprodustat Dose |            |            |            |
|--------------------------------------|------------|----------------------|------------------|------------|------------|------------|
|                                      |            |                      | 10 mg            | 15 mg      | 25 mg      | 30 mg      |
| <b>Transferrin (g/L)</b>             |            |                      |                  |            |            |            |
| <b>Baseline<sup>a</sup>, n</b>       | <b>18</b>  | <b>79</b>            | <b>20</b>        | <b>18</b>  | <b>21</b>  | <b>20</b>  |
| Mean±SD                              | 1.6±0.36   | 1.6±0.30             | 1.6±0.28         | 1.6±0.39   | 1.6±0.29   | 1.6±0.26   |
| <b>Day 29, n</b>                     | <b>17</b>  | <b>67</b>            | <b>19</b>        | <b>16</b>  | <b>17</b>  | <b>15</b>  |
| Mean±SD                              | 1.7±0.33   | 1.7±0.40             | 1.6±0.25         | 1.9±0.44   | 1.7±0.40   | 1.9±0.44   |
| <b>Absolute Change from Baseline</b> |            |                      |                  |            |            |            |
| Mean±SD                              | 0.06±0.265 | 0.12±0.313           | -0.01±0.238      | 0.15±0.246 | 0.08±0.379 | 0.31±0.309 |
| <b>TIBC (μmol/L)</b>                 |            |                      |                  |            |            |            |
| <b>Baseline<sup>a</sup>, n</b>       | <b>18</b>  | <b>79</b>            | <b>20</b>        | <b>18</b>  | <b>21</b>  | <b>20</b>  |
| Mean±SD                              | 39.8±7.97  | 37.7±6.47            | 36.7±6.51        | 38.1±8.66  | 37.9±5.29  | 38.1±5.60  |
| <b>Day 29, n</b>                     | <b>17</b>  | <b>67</b>            | <b>19</b>        | <b>16</b>  | <b>17</b>  | <b>15</b>  |
| Mean±SD                              | 39.2±7.00  | 41.3±7.44            | 36.9±5.85        | 43.8±8.54  | 41.1±6.55  | 44.6±6.73  |
| <b>Absolute Change from Baseline</b> |            |                      |                  |            |            |            |
| Mean±SD                              | 0.1±3.42   | 3.7±4.52             | 0.5±4.72         | 4.3±3.11   | 3.5±3.36   | 7.2±4.13   |
| <b>UIBC (μmol/L)</b>                 |            |                      |                  |            |            |            |
| <b>Baseline<sup>a</sup>, n</b>       | <b>18</b>  | <b>79</b>            | <b>20</b>        | <b>18</b>  | <b>21</b>  | <b>20</b>  |
| Mean±SD                              | 25.9±6.50  | 25.5±6.21            | 25.3±6.05        | 25.8±7.04  | 26.0±6.09  | 25.1±6.13  |
| <b>Day 29, n</b>                     | <b>17</b>  | <b>67</b>            | <b>19</b>        | <b>16</b>  | <b>17</b>  | <b>15</b>  |
| Mean±SD                              | 23.6±7.58  | 27.5±8.20            | 24.6±6.84        | 27.8±10.91 | 29.1±7.30  | 28.9±7.13  |
| <b>Absolute Change from Baseline</b> |            |                      |                  |            |            |            |
| Mean±SD                              | -1.9±6.67  | 2.1±7.51             | -0.4±7.38        | 1.1±8.56   | 3.6±5.04   | 4.6±8.28   |
| <b>CHr (pg)</b>                      |            |                      |                  |            |            |            |
| <b>Baseline<sup>a</sup>, n</b>       | <b>18</b>  | <b>79</b>            | <b>20</b>        | <b>18</b>  | <b>21</b>  | <b>20</b>  |
| Mean±SD                              | 32.1±2.19  | 31.4±1.86            | 31.6±1.84        | 31.1±2.06  | 31.2±1.57  | 31.5±2.05  |
| <b>Day 29, n</b>                     | <b>16</b>  | <b>64</b>            | <b>19</b>        | <b>14</b>  | <b>16</b>  | <b>15</b>  |
| Mean±SD                              | 31.6±2.03  | 31.7±1.89            | 32.0±1.41        | 31.4±1.95  | 31.5±2.04  | 32.0±2.27  |
| <b>Absolute Change from Baseline</b> |            |                      |                  |            |            |            |
| Mean±SD                              | -0.2±1.38  | 0.3±1.22             | 0.2±1.34         | 0.3±1.10   | 0.2±1.04   | 0.6±1.44   |
| <b>Total Iron (μmol/L)</b>           |            |                      |                  |            |            |            |
| <b>Baseline<sup>a</sup>, n</b>       | <b>18</b>  | <b>79</b>            | <b>20</b>        | <b>18</b>  | <b>21</b>  | <b>20</b>  |
| Mean±SD                              | 13.9±4.38  | 12.1±4.62            | 11.4±4.32        | 12.3±4.35  | 11.9±5.33  | 13.0±4.54  |
| <b>Day 29, n</b>                     | <b>17</b>  | <b>67</b>            | <b>19</b>        | <b>16</b>  | <b>17</b>  | <b>15</b>  |

|                                        |              |              |              |              |              |              |
|----------------------------------------|--------------|--------------|--------------|--------------|--------------|--------------|
| Mean±SD                                | 15.6±6.85    | 13.9±6.19    | 12.4±5.59    | 16.0±6.44    | 11.9±4.53    | 15.7±7.51    |
| <b>Absolute Change from Baseline</b>   |              |              |              |              |              |              |
| Mean±SD                                | 2.0±6.08     | 1.6±6.97     | 0.9±6.72     | 3.2±8.11     | -0.1±5.85    | 2.6±7.27     |
| <b>TSAT (%)</b>                        |              |              |              |              |              |              |
| <b>Baseline<sup>a</sup>, n</b>         | <b>18</b>    | <b>79</b>    | <b>20</b>    | <b>18</b>    | <b>21</b>    | <b>20</b>    |
| Geometric mean (CV%)                   | 33.7 (26.95) | 30.7 (35.66) | 28.9 (42.76) | 31.4 (29.03) | 29.9 (38.66) | 32.7 (31.61) |
| <b>Day 29, n</b>                       | <b>17</b>    | <b>67</b>    | <b>19</b>    | <b>16</b>    | <b>17</b>    | <b>15</b>    |
| Geometric mean (CV%)                   | 36.9 (42.82) | 30.6 (49.05) | 30.0 (54.01) | 34.5 (45.38) | 26.9 (46.69) | 31.8 (49.99) |
| <b>Relative % Change from Baseline</b> |              |              |              |              |              |              |
| geometric mean                         | 9.9          | -1.7         | 2.7          | 9.7          | -12.9        | -4.9         |

*CHr*, reticulocyte hemoglobin; *CV*, coefficient of variation; *ITT*, intention-to-treat; *SD*, standard deviation; *TIBC*, total iron binding capacity; *TSAT*, transferrin saturation; *UIBC*, unsaturated iron binding capacity.

<sup>a</sup>The day 1 pre-dose value.

**Table S4. Change from Baseline in Indices of Hematopoiesis (ITT Population)**

|                                      | Placebo   | Daprodustat<br>Total | Daprodustat Dose |           |           |           |
|--------------------------------------|-----------|----------------------|------------------|-----------|-----------|-----------|
|                                      |           |                      | 10 mg            | 15 mg     | 25 mg     | 30 mg     |
| <b>Hematocrit (%)</b>                |           |                      |                  |           |           |           |
| <b>Baseline<sup>a</sup>, n</b>       | <b>18</b> | <b>79</b>            | <b>20</b>        | <b>18</b> | <b>21</b> | <b>20</b> |
| Mean±SD                              | 33.0±3.39 | 32.8±3.02            | 33.1±2.31        | 33.7±4.31 | 32.5±2.78 | 32.1±2.43 |
| <b>Day 15, n</b>                     | <b>17</b> | <b>77</b>            | <b>19</b>        | <b>18</b> | <b>20</b> | <b>20</b> |
| Mean±SD                              | 32.4±2.88 | 33.3±3.25            | 32.4±3.71        | 32.6±2.82 | 34.2±3.09 | 33.9±3.15 |
| <b>Absolute Change from Baseline</b> |           |                      |                  |           |           |           |
| Mean±SD                              | -1.0±2.00 | 0.5±3.63             | -0.7±2.19        | -1.2±4.94 | 1.7±2.75  | 1.8±3.38  |
| <b>Day 29, n</b>                     | <b>16</b> | <b>64</b>            | <b>19</b>        | <b>14</b> | <b>16</b> | <b>15</b> |
| Mean±SD                              | 31.3±3.61 | 33.2±4.62            | 31.7±6.19        | 32.4±2.97 | 34.1±4.00 | 34.9±3.73 |
| <b>Absolute Change from Baseline</b> |           |                      |                  |           |           |           |
| Mean±SD                              | -2.2±2.47 | 0.2±5.01             | -1.3±5.40        | -1.5±5.38 | 1.5±4.51  | 2.2±3.85  |
| <b>RBC Count (10<sup>12</sup>/L)</b> |           |                      |                  |           |           |           |
| <b>Baseline<sup>a</sup>, n</b>       | <b>18</b> | <b>79</b>            | <b>20</b>        | <b>18</b> | <b>21</b> | <b>20</b> |
| Mean±SD                              | 3.4±0.37  | 3.5±0.38             | 3.5±0.30         | 3.6±0.49  | 3.4±0.31  | 3.4±0.38  |
| <b>Day 15, n</b>                     | <b>17</b> | <b>76</b>            | <b>19</b>        | <b>17</b> | <b>20</b> | <b>20</b> |
| Mean±SD                              | 3.4±0.31  | 3.5±0.38             | 3.4±0.41         | 3.5±0.34  | 3.5±0.29  | 3.5±0.47  |
| <b>Absolute Change from Baseline</b> |           |                      |                  |           |           |           |
| Mean±SD                              | -0.1±0.18 | 0.0±0.32             | -0.1±0.21        | -0.1±0.46 | 0.1±0.25  | 0.10±0.30 |
| <b>Day 29, n</b>                     | <b>16</b> | <b>64</b>            | <b>19</b>        | <b>14</b> | <b>16</b> | <b>15</b> |
| Mean±SD                              | 3.3±0.43  | 3.5±0.51             | 3.3±0.57         | 3.5±0.46  | 3.6±0.40  | 3.6±0.55  |
| <b>Absolute Change from Baseline</b> |           |                      |                  |           |           |           |
| Mean±SD                              | -0.2±0.26 | 0.0±0.45             | -0.1±0.49        | -0.1±0.50 | 0.1±0.42  | 0.2±0.34  |
| <b>Reticulocyte Count (%)</b>        |           |                      |                  |           |           |           |
| <b>Baseline<sup>a</sup>, n</b>       | <b>18</b> | <b>79</b>            | <b>20</b>        | <b>18</b> | <b>21</b> | <b>20</b> |
| Mean±SD                              | 1.6±0.57  | 1.7±0.68             | 1.7±0.53         | 1.6±0.70  | 1.6±0.65  | 1.8±0.86  |
| <b>Day 15, n</b>                     | <b>17</b> | <b>76</b>            | <b>20</b>        | <b>16</b> | <b>20</b> | <b>20</b> |
| Mean±SD                              | 1.2±0.53  | 2.0±1.14             | 1.4±0.73         | 1.8±0.82  | 2.5±1.46  | 2.4±1.03  |
| <b>Absolute Change from Baseline</b> |           |                      |                  |           |           |           |
| Mean±SD                              | -0.4±0.94 | 0.3±1.18             | -0.3±0.83        | 0.1±0.56  | 0.9±1.56  | 0.7±1.12  |
| <b>Day 29, n</b>                     | <b>16</b> | <b>63</b>            | <b>18</b>        | <b>14</b> | <b>16</b> | <b>15</b> |
| Mean±SD                              | 1.5±0.62  | 1.8±0.82             | 1.6±0.78         | 1.7±0.98  | 1.9±0.75  | 1.9±0.81  |
| <b>Absolute Change from Baseline</b> |           |                      |                  |           |           |           |
| Mean±SD                              | -0.1±0.85 | 0.1±0.69             | -0.1±0.80        | 0.0±0.58  | 0.4±0.55  | 0.1±0.70  |

*ITT*, intention-to-treat; *RBC*, red blood cells; *SD*, standard deviation.

<sup>a</sup>The day 1 pre-dose value.

**Table S5. Summary of Plasma Daprodustat Pharmacokinetic Parameters Following Dose Administration of Daprodustat (PK Population)**

| Daprodustat Dose | PK Parameter <sup>a</sup> |                             |                                   |                                   |                                      |                         |
|------------------|---------------------------|-----------------------------|-----------------------------------|-----------------------------------|--------------------------------------|-------------------------|
|                  | n                         | C <sub>max</sub><br>(ng/mL) | AUC <sub>(0-t)</sub><br>(ng.h/mL) | AUC <sub>(0-∞)</sub><br>(ng.h/mL) | t <sub>max</sub> <sup>b</sup><br>(h) | t <sub>1/2</sub><br>(h) |
| 10 mg            | 19                        | 140 (104.0)                 | 312 (91.4)                        | 348 (78.2) <sup>c</sup>           | 2.9 (1.0–12.5)                       | 2.1 (50.0) <sup>c</sup> |
| 15 mg            | 15                        | 141 (248.8)                 | 417 (168.6)                       | 384 (142.7) <sup>d</sup>          | 2.0 (0.8–8.3)                        | 1.9 (62.3) <sup>d</sup> |
| 25 mg            | 16                        | 247 (311.5)                 | 514 (396.1)                       | 1214 (41.6) <sup>e</sup>          | 2.0 (0.9–10.1)                       | 1.4 (58.4) <sup>e</sup> |
| 30 mg            | 14                        | 387 (99.4)                  | 1010 (92.3)                       | 1369 (59.3) <sup>f</sup>          | 1.9 (0.9–3.1)                        | 2.9 (38.7) <sup>f</sup> |

AUC<sub>0-t</sub>, area under the concentration-time curve from time 0 to time t; AUC<sub>0-∞</sub>, area under the concentration-time curve from time 0 to time infinity; C<sub>max</sub>, maximum observed plasma concentration; t<sub>1/2</sub>, half-life; t<sub>max</sub>, time to maximum observed plasma concentration.

<sup>a</sup>Geometric mean (%CV).

<sup>b</sup>Median (range).

<sup>c</sup>n = 12.

<sup>d</sup>n = 9.

<sup>e</sup>n = 8.

<sup>f</sup>n = 11.
