# Supplementary material for: A randomized, 29-day, dose-ranging, efficacy and safety study of daprodustat, administered three times weekly in patients with anemia on hemodialysis
Source: Springer Nature journal article supplement (doi:10.1186/s12882-019-1547-z), 2019-10-16
Supplement: MOESM2 [file 17279620]

Additional File 2 Participating research centers and IEC/IRB\* committees

|                                                                                                                                                                                                                                                                                                                                                                                                                                                                                                                                                                                                                                                                                                                                                                                                                                                                                                                                                                                                                                                                                                                                                                                                                                                                                                                                                                                                                                                                                                                                                                                                                                                                                                                                                          |                                                                                                                                                                                                                                                                                                                    |
|----------------------------------------------------------------------------------------------------------------------------------------------------------------------------------------------------------------------------------------------------------------------------------------------------------------------------------------------------------------------------------------------------------------------------------------------------------------------------------------------------------------------------------------------------------------------------------------------------------------------------------------------------------------------------------------------------------------------------------------------------------------------------------------------------------------------------------------------------------------------------------------------------------------------------------------------------------------------------------------------------------------------------------------------------------------------------------------------------------------------------------------------------------------------------------------------------------------------------------------------------------------------------------------------------------------------------------------------------------------------------------------------------------------------------------------------------------------------------------------------------------------------------------------------------------------------------------------------------------------------------------------------------------------------------------------------------------------------------------------------------------|--------------------------------------------------------------------------------------------------------------------------------------------------------------------------------------------------------------------------------------------------------------------------------------------------------------------|
| <p>State Budgetary Institution of Healthcare of Yaroslavl Region, Yaroslavl Regional Clinical Hospital, Cardiovascular Department, Yaroslavl, Russia</p> <p>Dialysis Center Saint Petersburg LLC, Saint Petersburg, Russia</p>                                                                                                                                                                                                                                                                                                                                                                                                                                                                                                                                                                                                                                                                                                                                                                                                                                                                                                                                                                                                                                                                                                                                                                                                                                                                                                                                                                                                                                                                                                                           | <p>Ethics Committee at State Budgetary Institution of Healthcare of Yaroslavl Region, Regional Clinical Hospital, 7, ulitsa Yakovlevskaya, Yaroslavl, 150062, Russia</p> <p>Local Ethics Committee at Dialysis Center Saint Petersburg LLC, 1, litera A, the Northern Avenue, Saint Petersburg, 194354, Russia</p> |
| <p><b>Spain</b></p>                                                                                                                                                                                                                                                                                                                                                                                                                                                                                                                                                                                                                                                                                                                                                                                                                                                                                                                                                                                                                                                                                                                                                                                                                                                                                                                                                                                                                                                                                                                                                                                                                                                                                                                                      | <p><b>All IRB and Ethics requests in Spain were approved through the same IEC/IRB:</b><br/>Comite Etico de Investigación Clínica del Hospital Universitario 12 de Octubre, Avenida de Cordoba s/n, Madrid, Madrid, 28041, Spain</p>                                                                                |
| <p>Hospital Universitario Infanta Sofia, Department of Nephrology, San Sebastian de los Reyes, Spain</p> <p>Centro de Diálisis de Alcobendas, Centro Diálisis Alcobendas. Fresenius Medical Care Madrid S.A., Diálisis, Madrid, Spain</p> <p>Hospital Universitari Germans Trias I Pujol, Badalona, Barcelona, Spain</p> <p>Hospital General Universitario de Guadalajara, Servicio de Nefrología, Guadalajara, Spain</p> <p>Complejo Hospitalario Torrecárdenas, Hospital de Torrecárdenas, Almería, Spain</p> <p>Complejo Hospitalario Universitario de Santiago, Servicio de Farmacia, Santiago de Compostela, A Coruna, Spain</p> <p>Hospital de Manises, Servicio de Nefrología, Avenida Generalitat Manises (Valencia), Spain</p> <p>Fundacion Jimenez Diaz 1, Servicio de Nefrología, Madrid, Spain</p> <p>Hospital Regional Universitario de Malaga, Pulmonology/Pneumonology Department, Malaga, Spain</p> <p>Hospital Universitario Nuestra Señora de La Candelaria, Servicio de Nefrología, Santa Cruz De Tenerife, Spain</p> <p>Hospital Universitario Marques de Valdecilla, Avenida. Marques de Valdecilla, Cantabria, Spain</p> <p>Corporacio Sanitaria Parc Tauli, Servicio de Nefrología, Edificio Albada, Barcelona, Spain</p> <p>Centro de Diálisis de Granollers, Fresenius Medical Care Services Catalunya S.L, Diálisis, Barcelona, Spain</p> <p>Centro de Diálisis de Terrassa, Fresenius Medical Care Services Catalunya S.L, Diálisis, Barcelona, Spain</p> <p>Hospital del Mar, Servicio De Nephrología, Barcelona, Spain</p> <p>Hospital Universitario 12 de Octubre, Servicio de Nefrología., Madrid, Spain</p> <p>Centro de Dialisis Leon. Fresenius Medical Care Services Castilla y Leon, S.L., Dialisis, Leon, Spain</p> |                                                                                                                                                                                                                                                                                                                    |

Additional File 2 Participating research centers and IEC/IRB\* committees

|                      |                                                                                                                                                                                                                                                                                                                                                                                                                                                                                                                                                                                                                                                                                                                                                                                                                                                                                                                                                                                                                                                                                                                                          |
|----------------------|------------------------------------------------------------------------------------------------------------------------------------------------------------------------------------------------------------------------------------------------------------------------------------------------------------------------------------------------------------------------------------------------------------------------------------------------------------------------------------------------------------------------------------------------------------------------------------------------------------------------------------------------------------------------------------------------------------------------------------------------------------------------------------------------------------------------------------------------------------------------------------------------------------------------------------------------------------------------------------------------------------------------------------------------------------------------------------------------------------------------------------------|
|                      | <p>Centro de Dialisis Valladolid,<br/>Fresenius Medical Care Services<br/>Castilla y Leon, S.L., Dialisis, Valladolid, Spain</p> <p>Hospital Universitari Arnau de Vilanova,<br/>Servicio de nefrología,<br/>Lleida, Spain</p> <p>Hospital Universitario de Bellvitge,<br/>Feixa Llarga s/n, L'Hospitalet de Llobregat,<br/>Barcelona, Spain</p> <p>Hospital General Universiatrio de<br/>Ciudad Real, Nefrología, Unidad de Dialisis,<br/>C/ del Obispo Rafael Torija, Ciudad Real, Spain</p>                                                                                                                                                                                                                                                                                                                                                                                                                                                                                                                                                                                                                                           |
| <b>United States</b> | <p><b>All IRB and Ethics requests in the United States were approved through the same IEC/IRB:</b><br/>Quorum Review Institutional Review Board, Suite 800, 1501 Fourth Avenue,<br/>Seattle, Washington, 98101, United States</p>                                                                                                                                                                                                                                                                                                                                                                                                                                                                                                                                                                                                                                                                                                                                                                                                                                                                                                        |
|                      | <p>Michigan Kidney Consultants, PC<br/>Pontiac, Michigan, United States</p> <p>Paragon Health // PC DBA<br/>Nephrology Center Kalamazoo, Michigan, United States</p> <p>Clinical Research Consultants, LLC<br/>Kansas City, Missouri, United States</p> <p>Valley Renal Medical Group<br/>Clinical Research Center<br/>Northridge, California, United States</p> <p>North America Research Institute<br/>San Dimas, California, United States</p> <p>Seacoast Kidney &amp; Hypertension Specialists<br/>Portsmouth, New Hampshire, United States</p> <p>San Diego Institute of Medical Research<br/>Escondido, California, United States</p> <p>Nephrology &amp; Hypertension Associates<br/>Waters Place, Bronx, New York, United States</p> <p>A. Kaldun Nossuli MD/Research<br/>Greenbelt, Maryland, United States</p> <p>Saint Clair Nephrology Research<br/>Roseville, Michigan, United States</p> <p>Kansas Nephrology Research Institute LLC<br/>Wichita, Kansas, United States</p> <p>Downey Dialysis Center<br/>Downey, California, United States</p> <p>Pines Clinical Research Inc.<br/>Hollywood, Florida, United States</p> |

\*Institutional Review Board reference numbers are not available.
